# Supplementary material for: Identification of molecular diagnostic markers in sepsis-induced acute lung injury
Source: Preprints.org preprint supplement (doi:10.20944/preprints202308.0067.v1), 2023-08-01

# 上海交通大学医学院附属新华医院医学伦理委员会

Ethics Committee of Xinhua Hospital Affiliated to Shanghai Jiao Tong University School of Medicine

Approval No. XHEC-D-2023-138

Dear editor:

The ethics committee of Xinhua hospital strictly follows the Declaration of Helsinki and International Ethical Guidelines for Health-related Research Involving Humans, etc., to perform independent ethical review duties. The manuscript *Identification of molecular diagnostic markers in acute lung injury induced by sepsis* submitted by Yingying Huang et al. to your journal belongs to the category of public data analysis articles, and does not need to be reviewed according to the current relevant ethical regulations. This study utilizes publicly available data obtained legally or data generated through observation without interfering with public behavior, which complies with the conditions for exemption from review as stated in the 'Ethical Review Measures for Life Sciences and Medical Research Involving Humans.' This ethics committee will no longer provide review instructions.

Hereby explain!

Medical Ethics Committee of Xinhua Hospital Affiliated to Shanghai Jiao Tong University School of Medicine

July 21, 2023

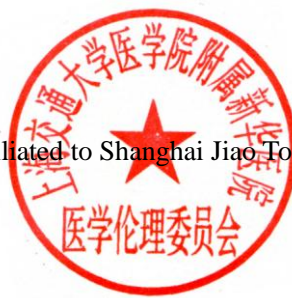

Supplement: Supplementary file 1 [file supplementary]
